# Supplementary material
Source: PubMed Central journal article supplement (PMC3525898)
Supplement: Supp_Fig1.pdf [file Supp_Fig1.pdf]

## Supplementary Data

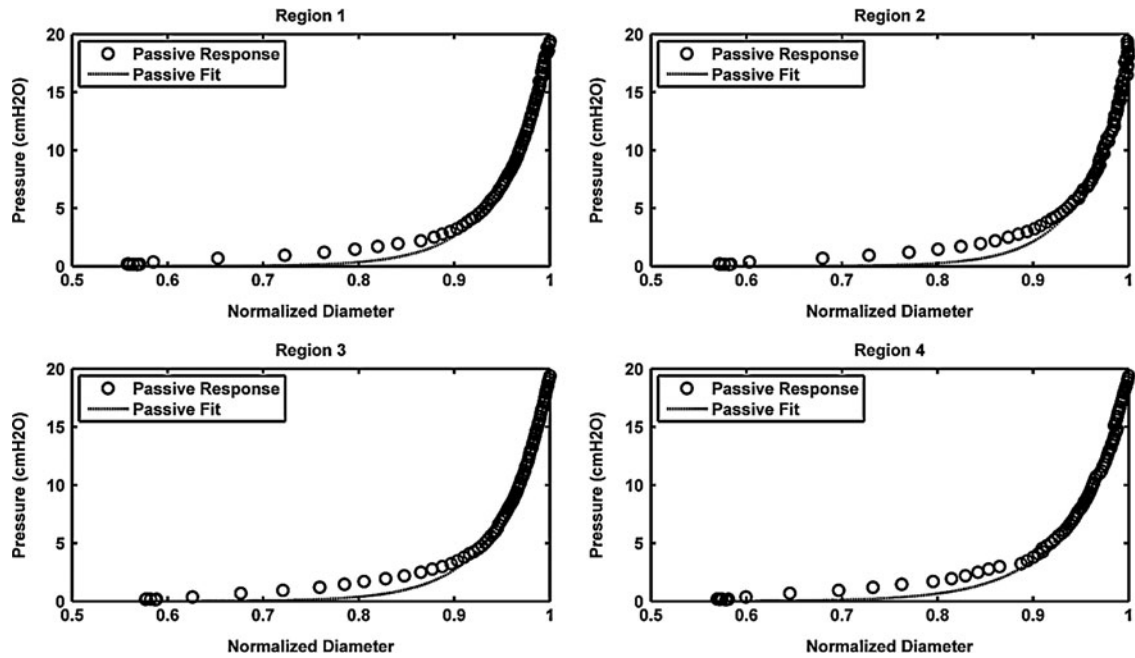

**SUPPLEMENTARY FIG. S1.** Exponential fit of passive pressure-diameter response for lymphatic vessels using Equation 1. Note that the exponential fit does not accurately capture the pressure-diameter response at low pressures (i.e.,  $p < 5$  cmH<sub>2</sub>O). The exponential+cubic model (described in Equation 2) is able to capture the lymphatic pressure-diameter response at low pressures because of the inclusion of the cubic term which adheres to “tube law”, which better describes the change in vessel compliance.
